# Supplementary material
Source: HighWire-hosted journal article supplement (https://bmjopen.bmj.com/content/13/9/e070499)
Supplement: inline-supplementary-material-1 [file inline-supplementary-material-1.pdf]

Semi-structured interview for each participant (post- intervention):

| <b>Participation in the “ACT-IC” intervention</b>                                                     |   |   |   |   |   |   |   | <b>Reflection</b>                                                                                                                                   |
|-------------------------------------------------------------------------------------------------------|---|---|---|---|---|---|---|-----------------------------------------------------------------------------------------------------------------------------------------------------|
| <b>1. I enjoyed the collaborative goal-setting with the motivational coach</b>                        | 1 | 2 | 3 | 4 | 5 | 6 | 7 | Why/why not?<br>- Possible points for improvement?                                                                                                  |
| <b>2. The action list for my goals helped me to structure a way to change my undesired situations</b> | 1 | 2 | 3 | 4 | 5 | 6 | 7 | Why/why not?<br>- Possible points for improvement?                                                                                                  |
| <b>3. I think the weekly coaching was a good addition to the program</b>                              | 1 | 2 | 3 | 4 | 5 | 6 | 7 | Why/why not?<br>- Possible points for improvement?                                                                                                  |
| <b>4. Weekly talk to the coach motivated me to follow my goals</b>                                    | 1 | 2 | 3 | 4 | 5 | 6 | 7 | - Possible points for improvement?                                                                                                                  |
| <b>5. I found the duration of the coaching sessions (~20 minutes) sufficient</b>                      | 1 | 2 | 3 | 4 | 5 | 6 | 7 | - - Shorter or longer?                                                                                                                              |
| <b>6. I think one week interval between coaching sessions was enough</b>                              | 1 | 2 | 3 | 4 | 5 | 6 | 7 | - Shorter or longer?                                                                                                                                |
| <b>7. I made use of:</b>                                                                              |   |   |   |   |   |   |   |                                                                                                                                                     |
| <b>7a. Conversations with the coach</b>                                                               | 1 | 2 | 3 | 4 | 5 | 6 | 7 | - Why/why not?<br>- What did/didn't appeal to you in this?                                                                                          |
| <b>7b. The step-by-step plan toward my goals</b>                                                      | 1 | 2 | 3 | 4 | 5 | 6 | 7 | - Why/why not?<br>- What did/didn't appeal to you in this?                                                                                          |
| <b>Open reflection</b>                                                                                |   |   |   |   |   |   |   | - How did you find the intervention?<br>- Did you struggle with or miss any web features?<br>- Would you delete any certain features?<br>Which/why? |
| <b>8. I could read the text on the website well</b>                                                   | 1 | 2 | 3 | 4 | 5 | 6 | 7 | - points regarding text size, contrast, amount?                                                                                                     |
| <b>9. I liked the amount of information offered per module</b>                                        | 1 | 2 | 3 | 4 | 5 | 6 | 7 | - Points regarding length of the video, amount of text in the introduction?                                                                         |

|                                                                                                      |   |   |   |   |   |   |   |                                                                                                                                                                                                          |
|------------------------------------------------------------------------------------------------------|---|---|---|---|---|---|---|----------------------------------------------------------------------------------------------------------------------------------------------------------------------------------------------------------|
| <b>10. I found the content of the modules clear and easy to understand</b>                           | 1 | 2 | 3 | 4 | 5 | 6 | 7 | - Easy to understand/follow?<br>- Why/why not?                                                                                                                                                           |
| <b>11. I found the modules useful</b>                                                                | 1 | 2 | 3 | 4 | 5 | 6 | 7 | - Why/why not?<br>- Possible points for improvement?                                                                                                                                                     |
| <b>12. I liked the amount of time I spent on each module</b>                                         | 1 | 2 | 3 | 4 | 5 | 6 | 7 | - How much time did you spend per module?<br>- What did you spend the most time with?<br>- Would you have preferred to spend more/less time on it?                                                       |
| <b>13. I found one week interval between modules enough</b>                                          | 1 | 2 | 3 | 4 | 5 | 6 | 7 | - Possible points for improvement?                                                                                                                                                                       |
| <b>14. I liked the number of modules (9)</b>                                                         | 1 | 2 | 3 | 4 | 5 | 6 | 7 | - More or less?                                                                                                                                                                                          |
| <b>15. I made use of:</b>                                                                            |   |   |   |   |   |   |   |                                                                                                                                                                                                          |
| <b>15a. The introductory videos</b>                                                                  | 1 | 2 | 3 | 4 | 5 | 6 | 7 | - Why/why not?<br>- What did/didn't appeal to you in this regard?                                                                                                                                        |
| <b>15b. The assignments</b>                                                                          | 1 | 2 | 3 | 4 | 5 | 6 | 7 | - Why/why not?<br>- What did/didn't appeal to you in this regard?                                                                                                                                        |
| <b>Open reflection</b>                                                                               |   |   |   |   |   |   |   | - Did you find it complete?<br>- Did you miss any features? Suggestions?<br>- Would you delete certain features? Which?                                                                                  |
| <b>16. I liked the structure of the modules (action list, step-by-step plan, modules, coaching).</b> | 1 | 2 | 3 | 4 | 5 | 6 | 7 | Logical structure<br>- Did you follow all the components? Why/why not?<br>- What part(s) of the intervention did you find most helpful or effective and what parts not?<br>- Did you miss any component? |
| <b>17. I am generally satisfied with what was offered to me during the intervention</b>              | 1 | 2 | 3 | 4 | 5 | 6 | 7 | - Why/why not?<br>- Possible points for improvement?                                                                                                                                                     |

|                                                                                                                                             |   |   |   |   |   |   |   |                                                      |
|---------------------------------------------------------------------------------------------------------------------------------------------|---|---|---|---|---|---|---|------------------------------------------------------|
| <b>18. I have used the information offered during the intervention in my daily life</b>                                                     | 1 | 2 | 3 | 4 | 5 | 6 | 7 | - Why/why not?<br>- What was that about?             |
| <b>19. After taking the course, it is easier for me to find the balance between my personal needs and my caregiving responsibilities</b>    | 1 | 2 | 3 | 4 | 5 | 6 | 7 | - Why/why not?<br>- What was that about?             |
| <b>20. The course helped me to critically evaluate my situation</b>                                                                         | 1 | 2 | 3 | 4 | 5 | 6 | 7 | - Why/why not?<br>- Possible points for improvement? |
| <b>21. After following this program I know how to deal with unwanted situations more easily in the future</b>                               | 1 | 2 | 3 | 4 | 5 | 6 | 7 | - Why/why not?<br>- Possible points for improvement? |
| <b>22. I would recommend the program to other carers of people with dementia</b>                                                            | 1 | 2 | 3 | 4 | 5 | 6 | 7 | -Why/why not?<br>- Which aspects in particular?      |
| <b>23. I experienced privacy issues:</b>                                                                                                    |   |   |   |   |   |   |   |                                                      |
| <b>23a. In general</b>                                                                                                                      | 1 | 2 | 3 | 4 | 5 | 6 | 7 | -What did you (dis)like?<br>- What was that about?   |
| <b>23b. During communication with my coach</b>                                                                                              | 1 | 2 | 3 | 4 | 5 | 6 | 7 | -What did you (dis)like?<br>- What was that about?   |
| <b>24. Open reflection</b><br>- Is there anything else you would like to say about using the program or your satisfaction with the program? |   |   |   |   |   |   |   |                                                      |
